# Supplementary figures and images for: Dosimetric analysis of 123I, 125I and 131I in thyroid follicle models
Source: Springer Nature journal article supplement (doi:10.1186/s13550-014-0023-9), 2014-06-10

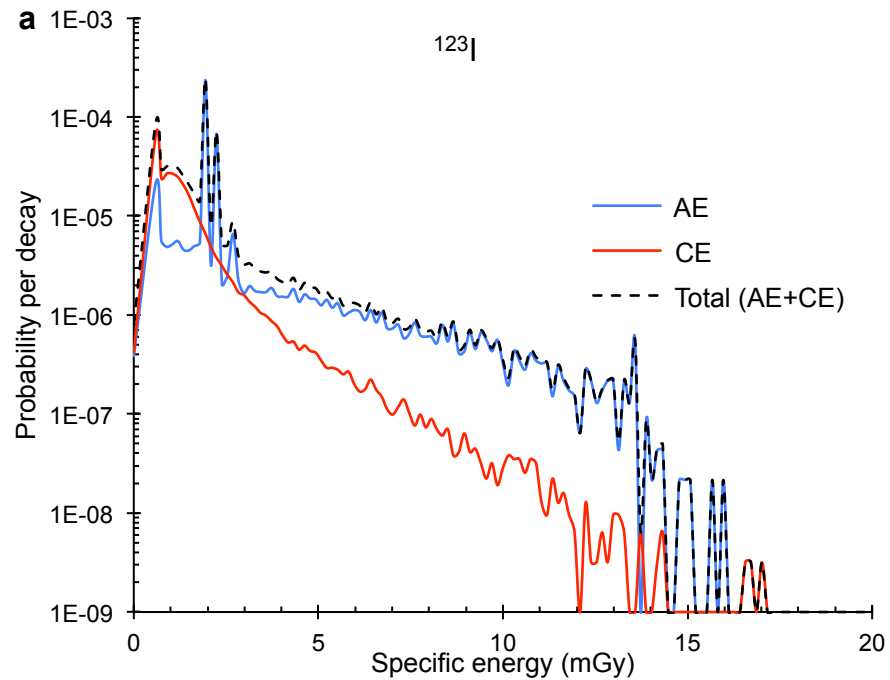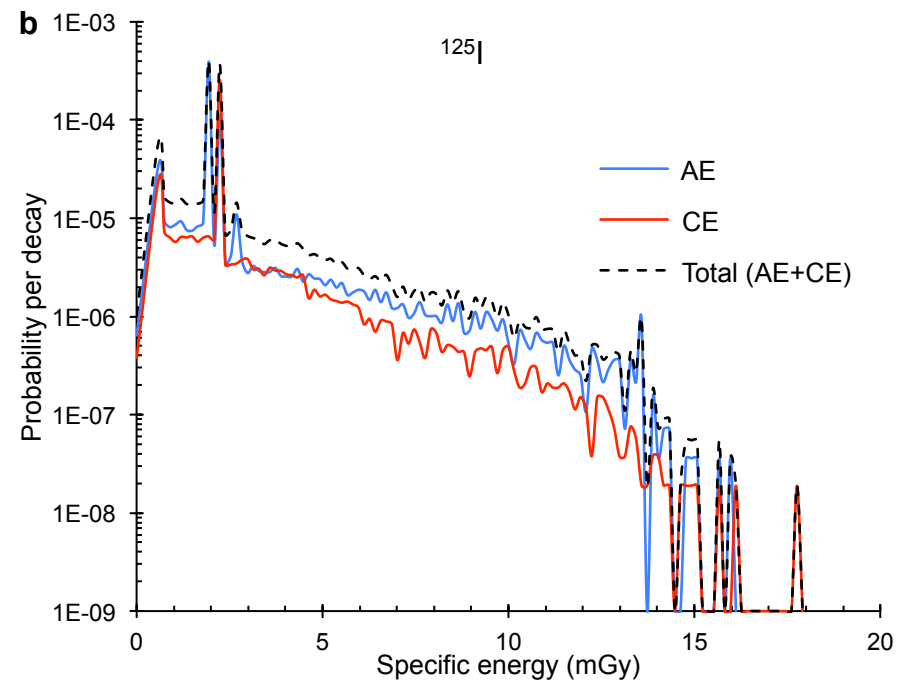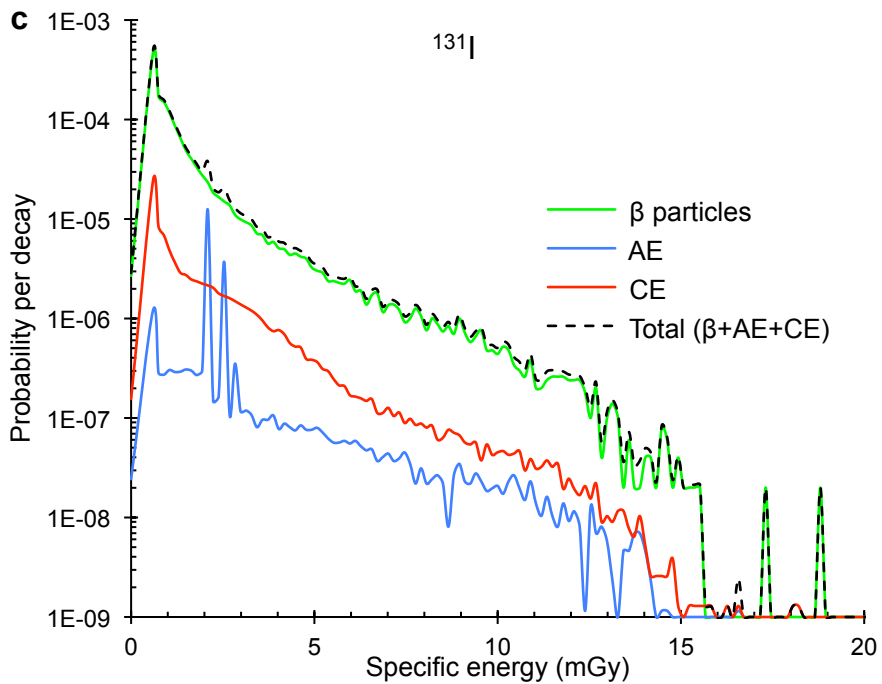

Supplement: MOESM5 [file 9786186]

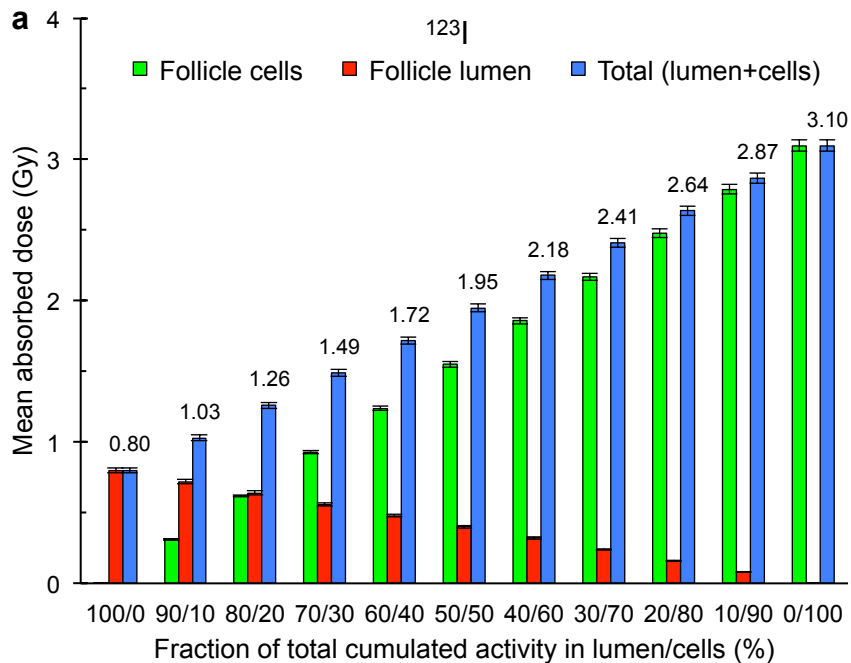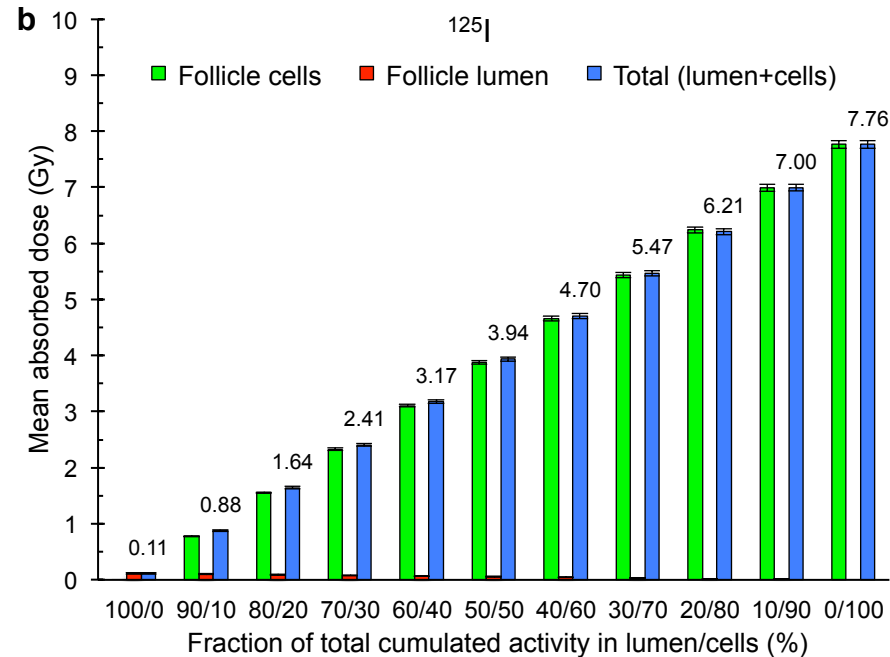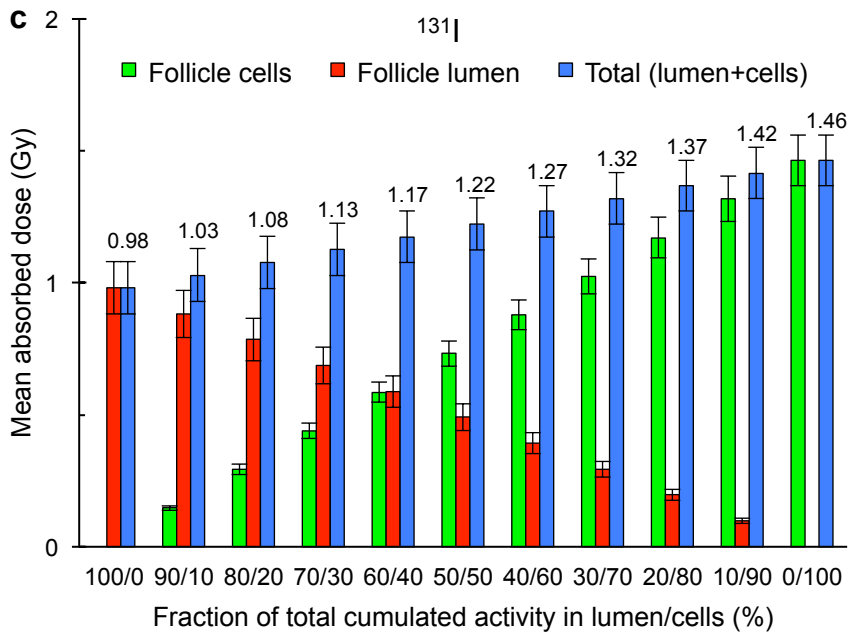

Supplement: MOESM6 [file 9786186]
